# Supplementary material for: Antiproliferative activity of Fe(ii), Co(ii), Ni(ii), Cu(ii), and Zn(ii) complexes of dithiocarbamate: synthesis, structural characterization, and thermal studies
Source: Royal Society of Chemistry journal article supplement (doi:10.1039/d3dt03724j), 2023-12-07
Supplement: d3dt03724j1.pdf [file d3dt03724j1.pdf]

# Antiproliferative activity of Fe(II), Co(II), Ni(II), Cu(II), and Zn(II) complexes of dithiocarbamate: Synthesis, structural characterization, and thermal studies

Anupam Singh<sup>a</sup>, Kunal Shiv<sup>a</sup>, Ranjeet Singh<sup>b</sup>, M. K. Bharty<sup>a</sup>, Partha Pratim Manna<sup>b\*</sup> and Lal Bahadur Prasad<sup>a\*</sup>

<sup>a</sup>Department of Chemistry, Institute of Science, Banaras Hindu University, Varanasi 221005, India

<sup>b</sup>Immunobiology Laboratory, Department of Zoology, Institute of Science, Banaras Hindu University, Varanasi- 221005

\*Corresponding authors' Email: [lbprasad@bhu.ac.in](mailto:lbprasad@bhu.ac.in) (L. B. Prasad), [pp\\_manna@yahoo.com](mailto:pp_manna@yahoo.com) (P. P. Manna)

| S.N. | Contents               | Page No. |
|------|------------------------|----------|
| 1    | FTIR Spectra           | 2        |
| 2    | NMR Spectra            | 3-8      |
| 3    | HRMS Spectra           | 9-12     |
| 4    | X-Ray Crystallography  | 12-14    |
| 5    | Biological Application | 15       |
| 6    | References             | 15       |

## 1. FTIR Spectra:

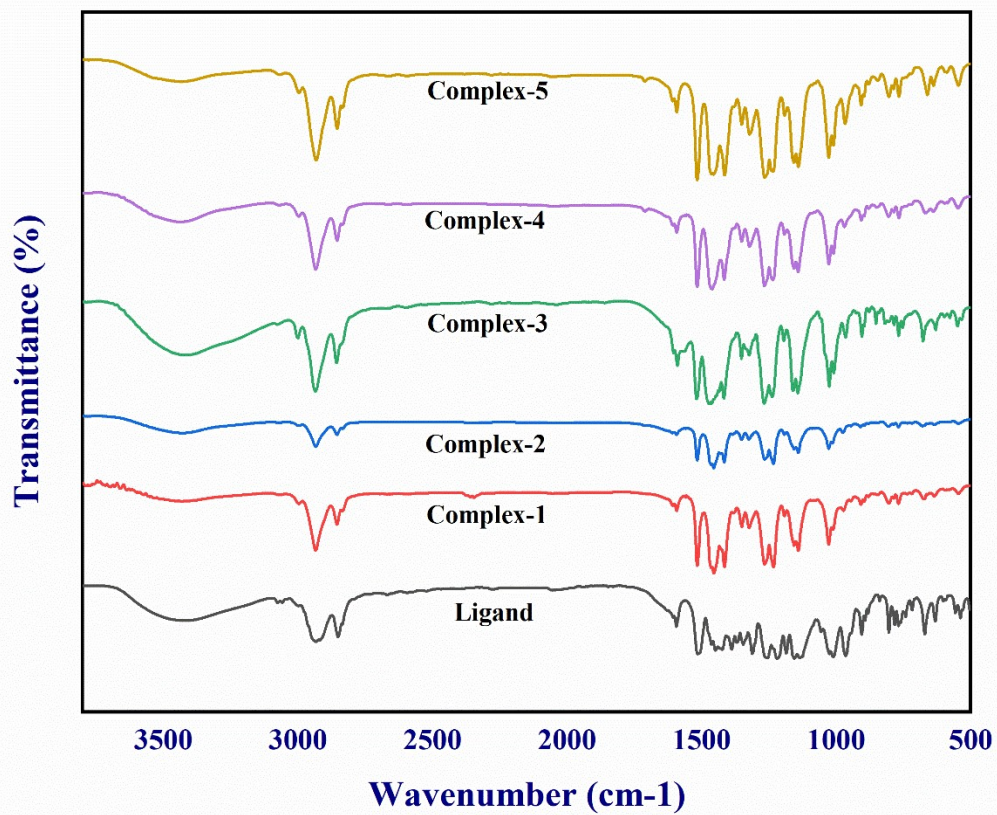

Fig. S1: FTIR spectra of ligand and complexes 1-5.

## 2. NMR Spectra:

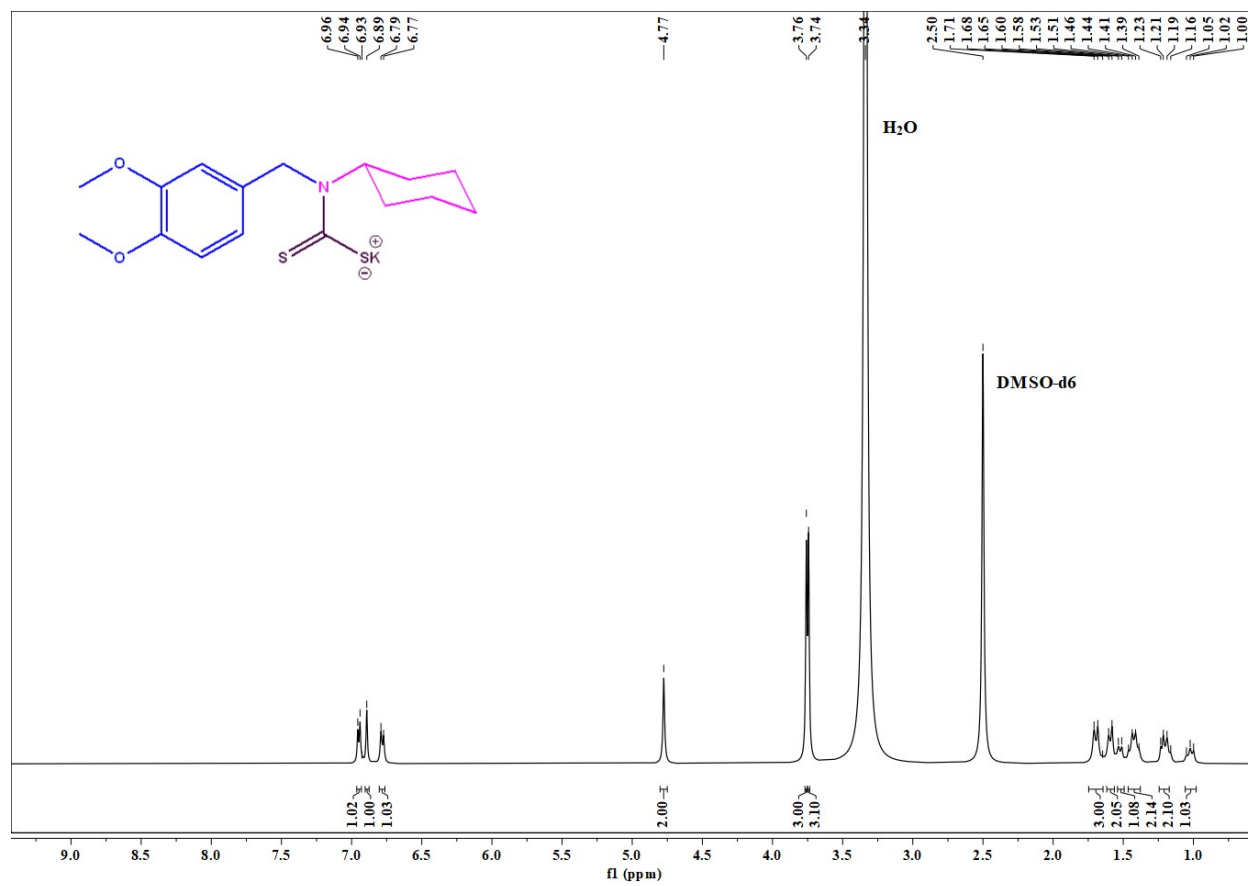

Fig. S2:  $^1\text{H}$  NMR spectrum of ligand.

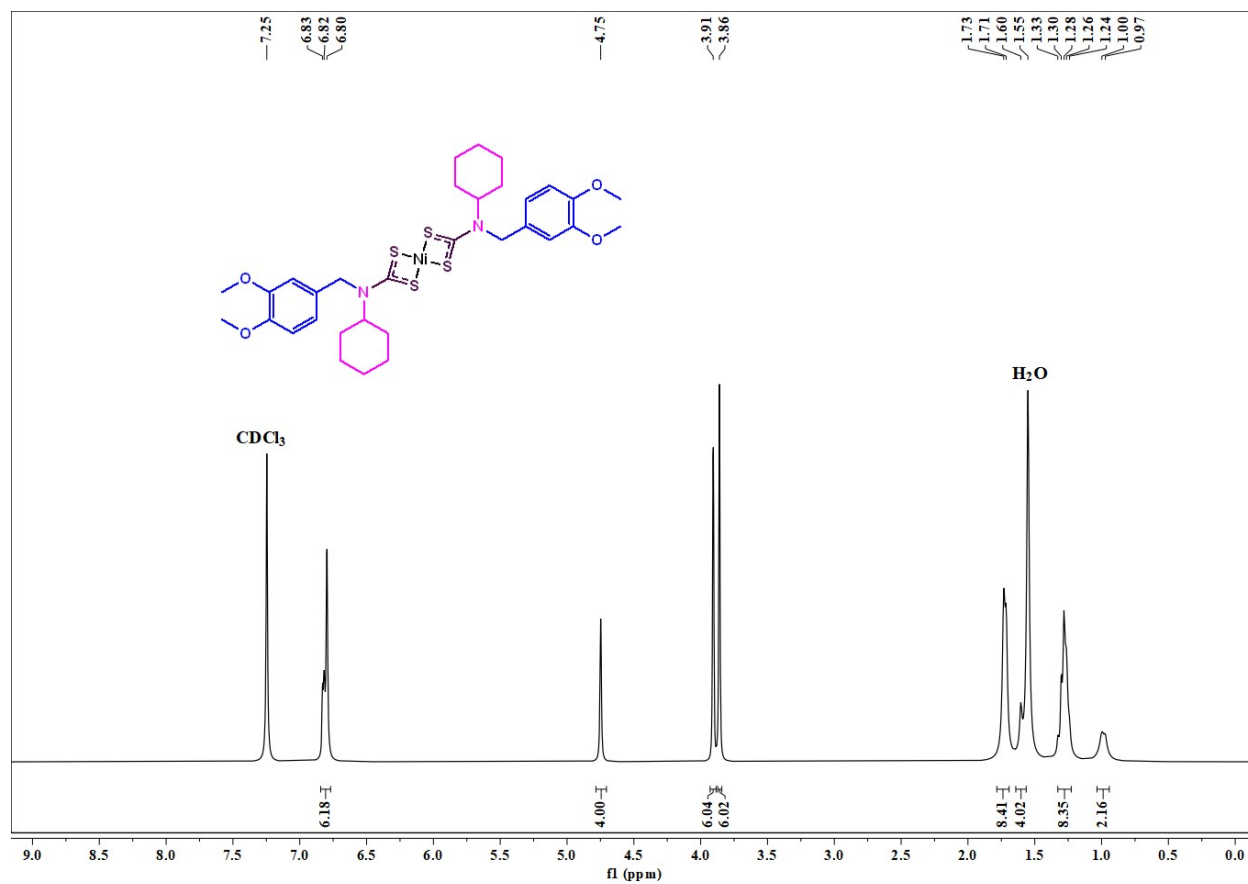

Fig. S3:  $^1\text{H NMR}$  spectrum of complex 3.

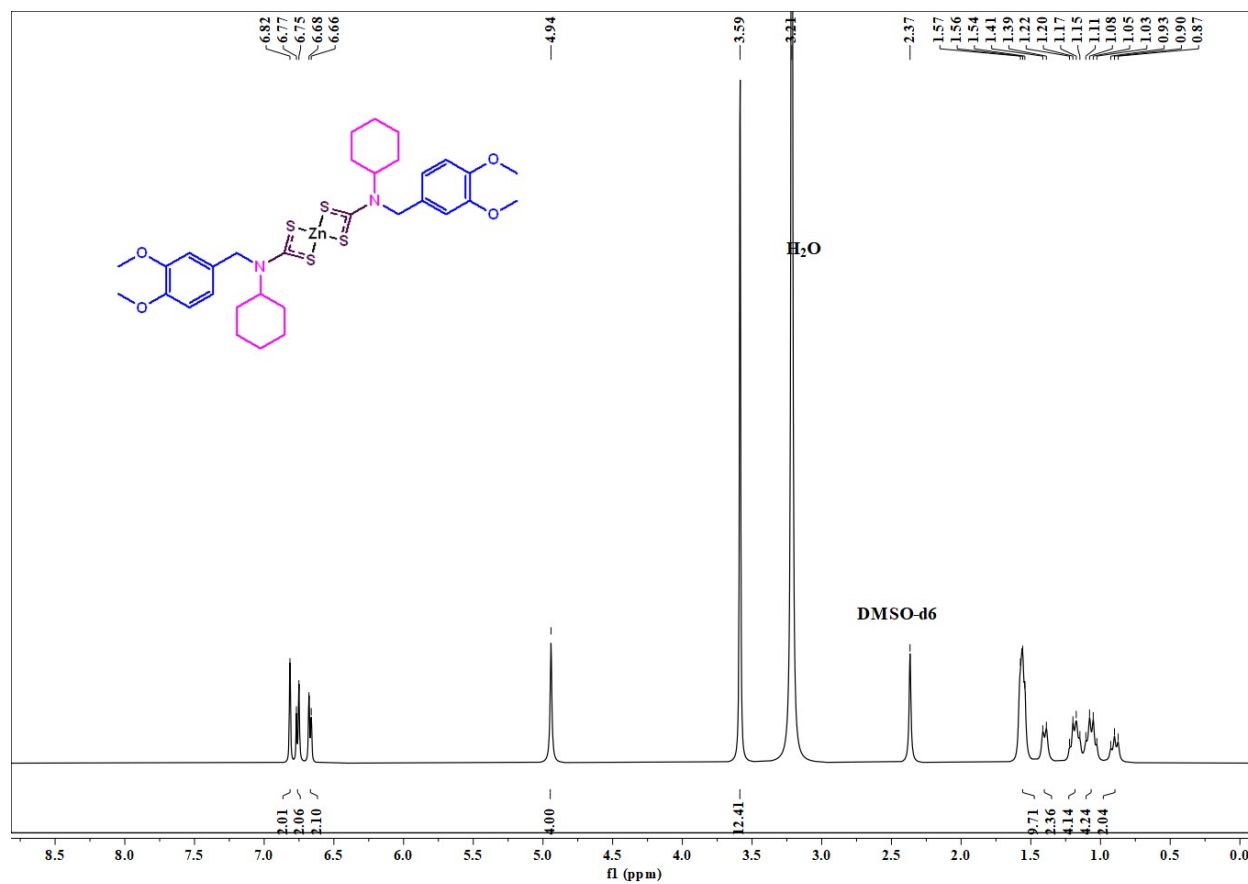

Fig. S4:  $^1\text{H}$  NMR spectrum of complex 5.

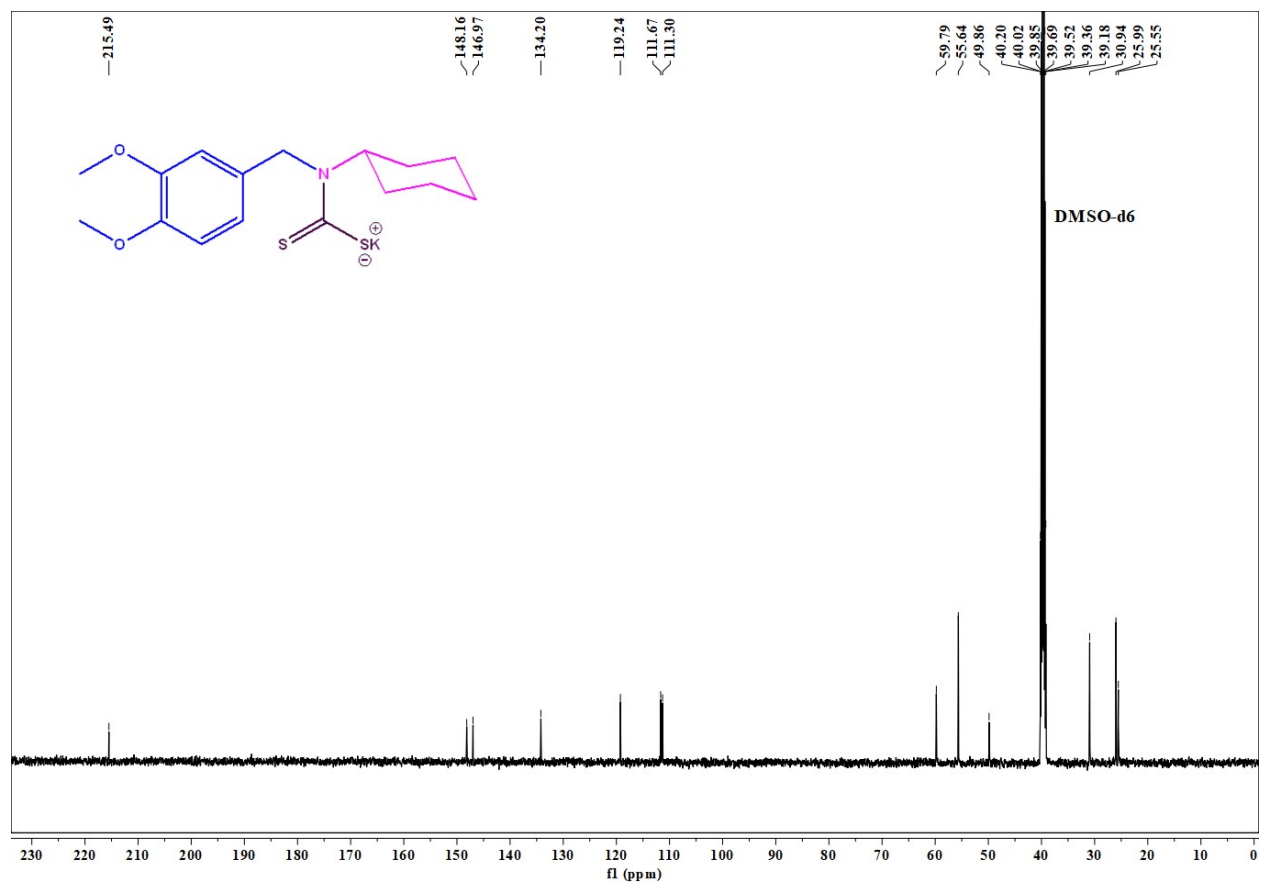

Fig. S5:  $^{13}\text{C}$  NMR spectrum of ligand.

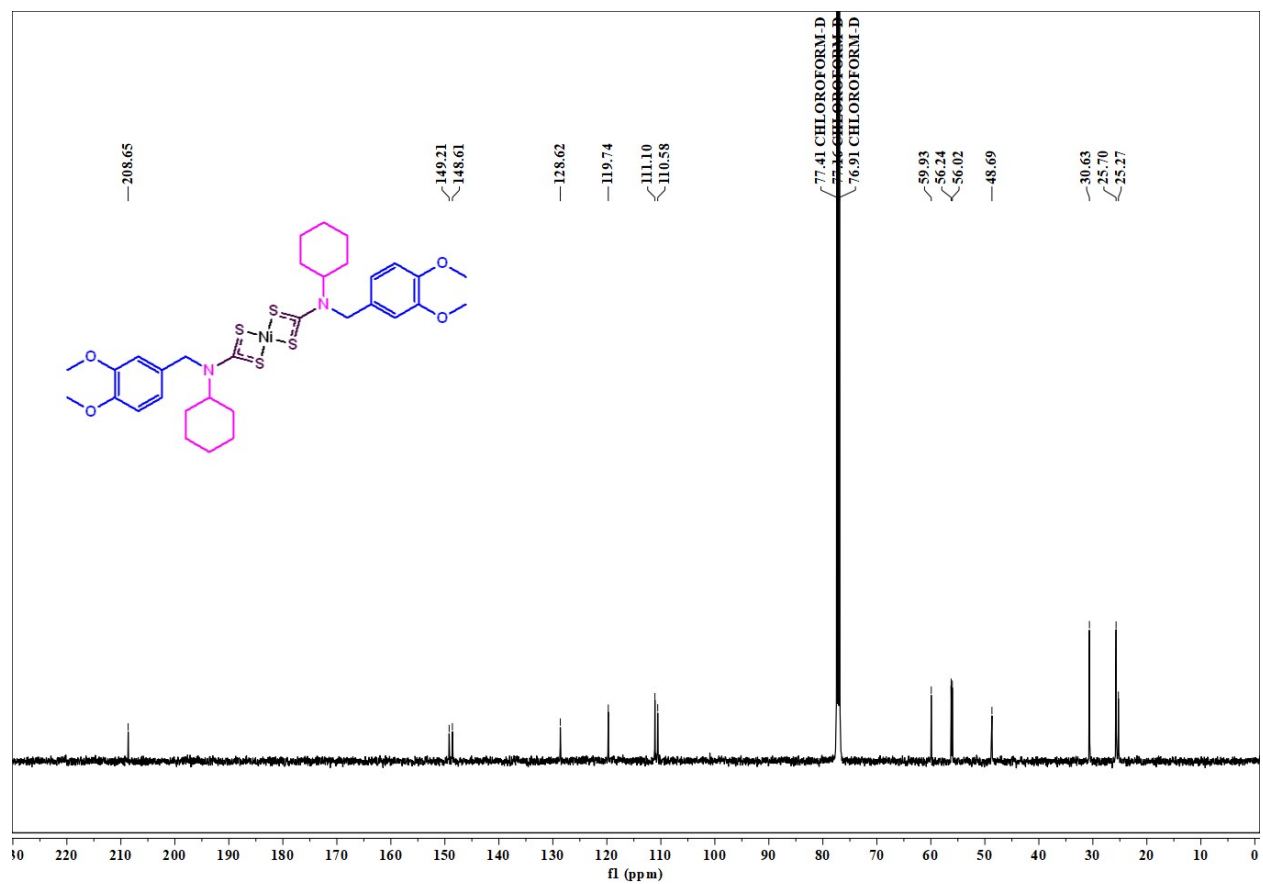

Fig. S6:  $^{13}\text{C}$  NMR spectrum of complex 3.

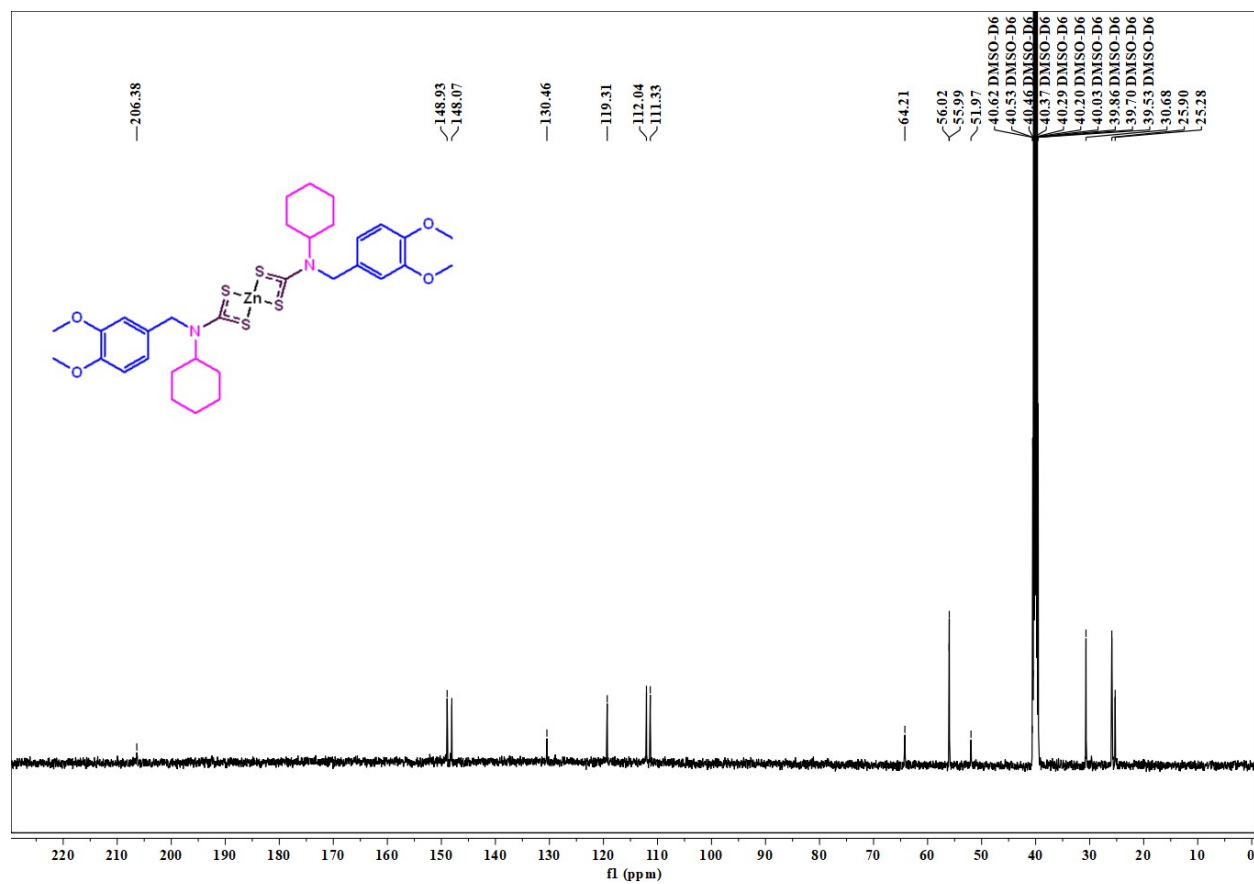

Fig. S7:  $^{13}\text{C}$  NMR spectrum of complex 5.



### 3. HRMS Spectra:

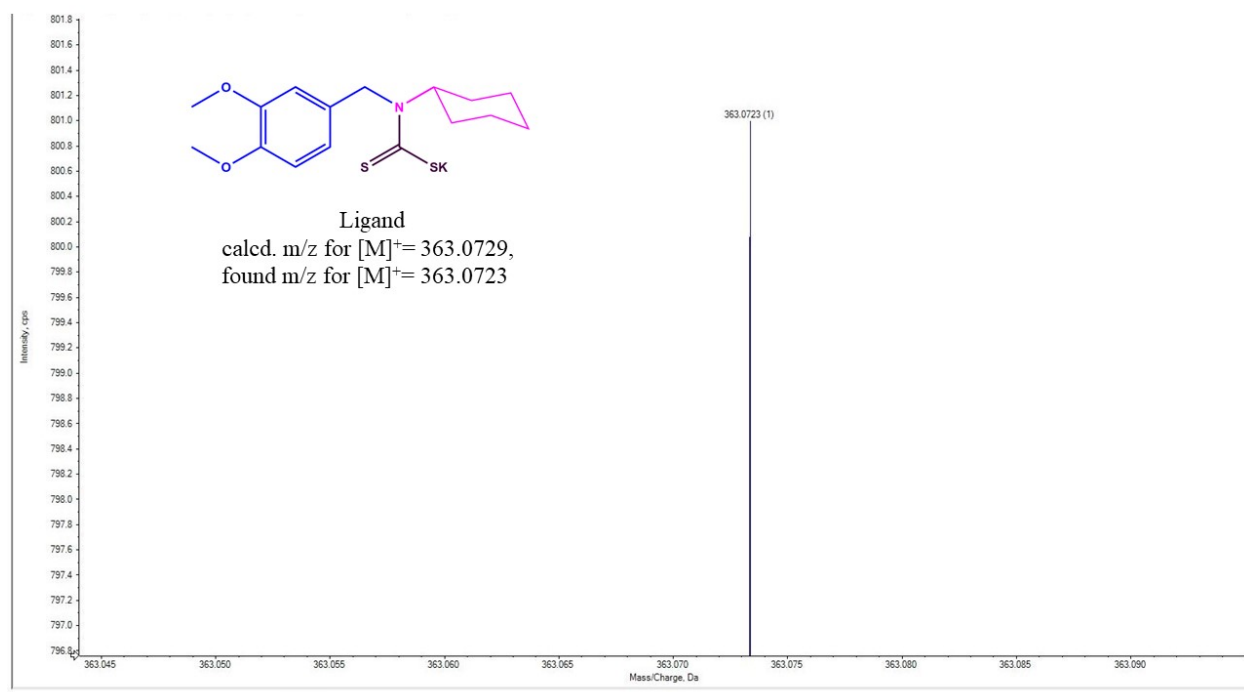

Fig. S8: HRMS spectrum of ligand.

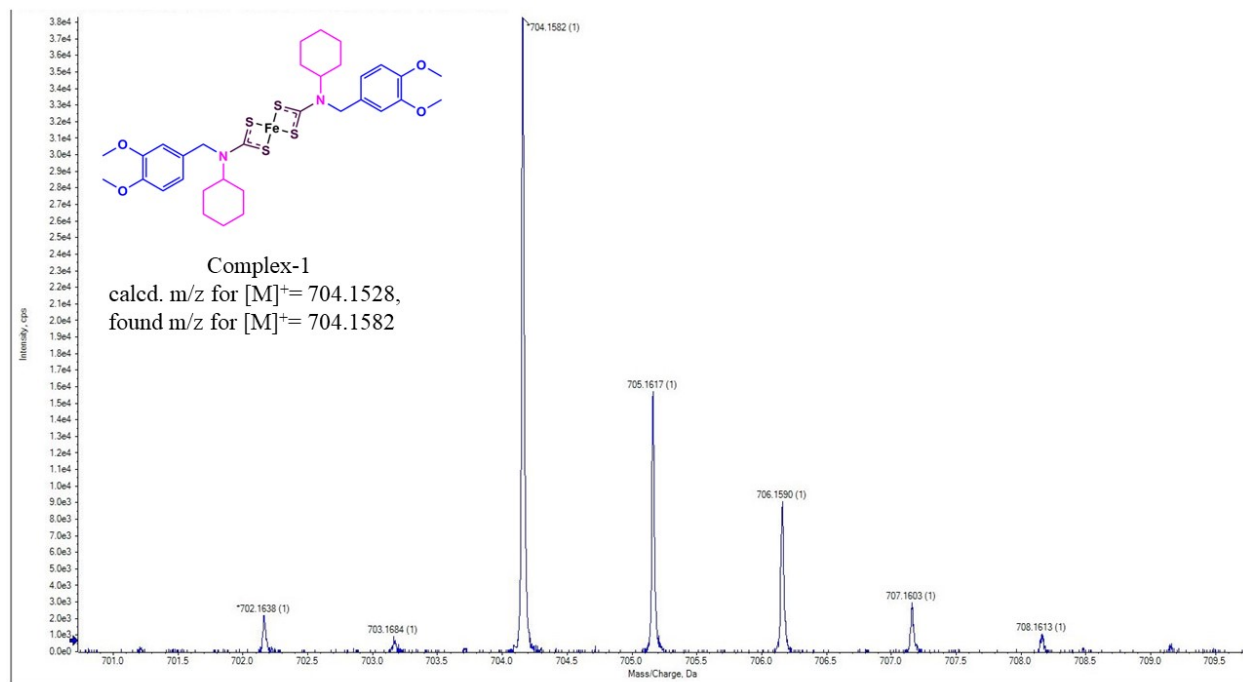

Fig. S9: HRMS spectrum of complex 1.

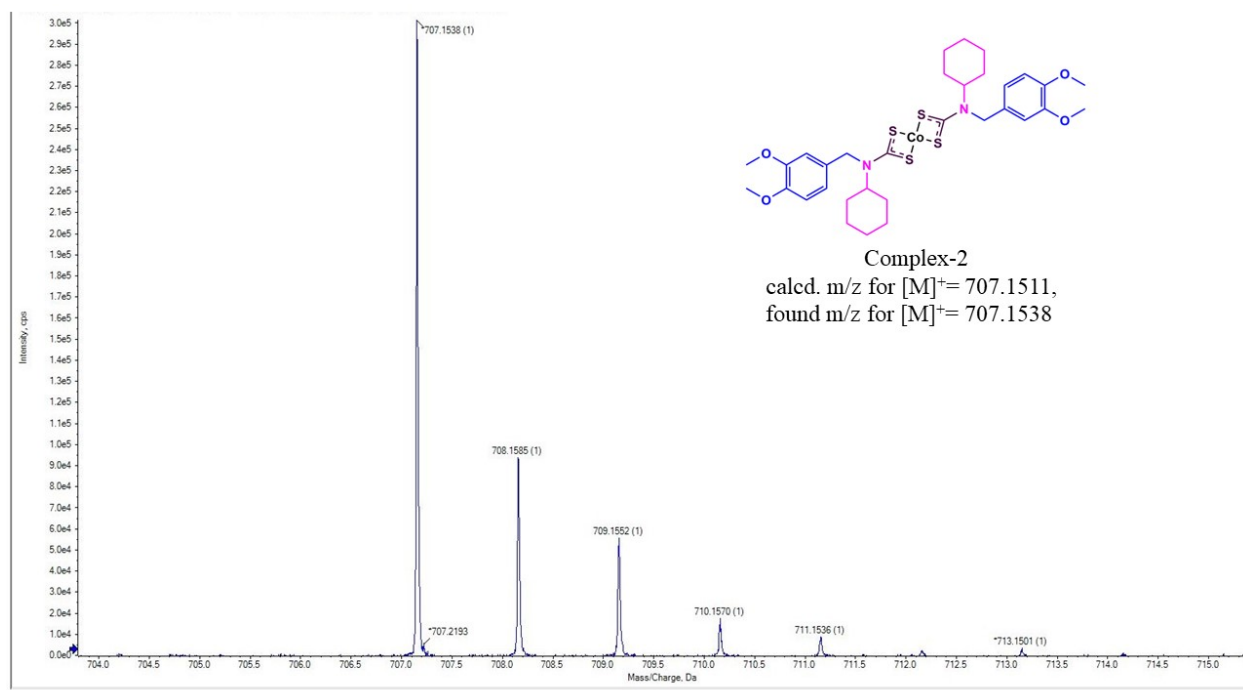

Fig. S10: HRMS spectrum of complex 2.

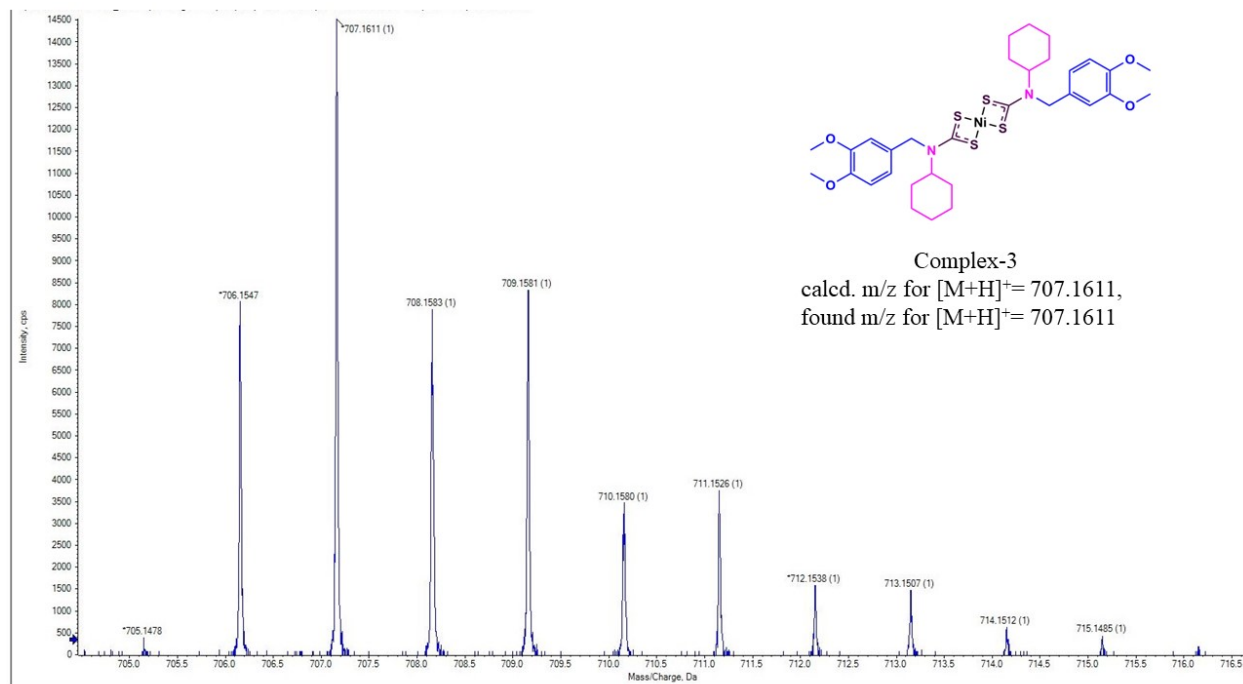

Fig. S11: HRMS spectrum of complex 3.

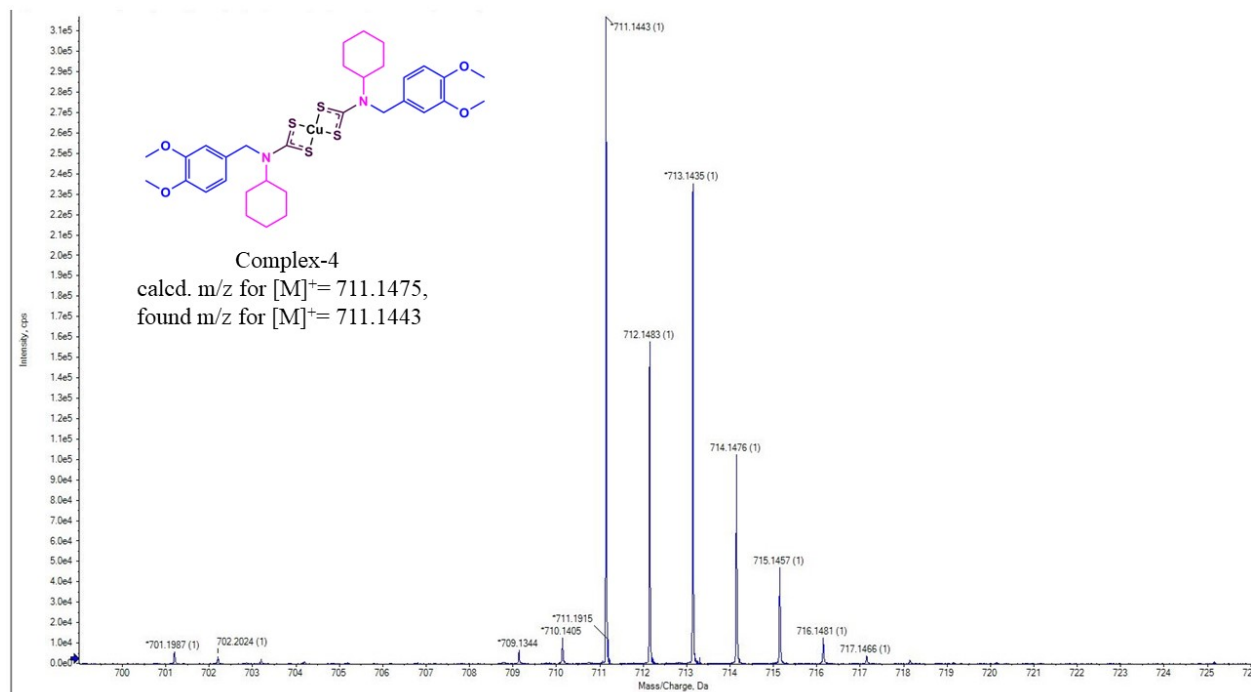

Fig. S12: HRMS spectrum of complex 4.

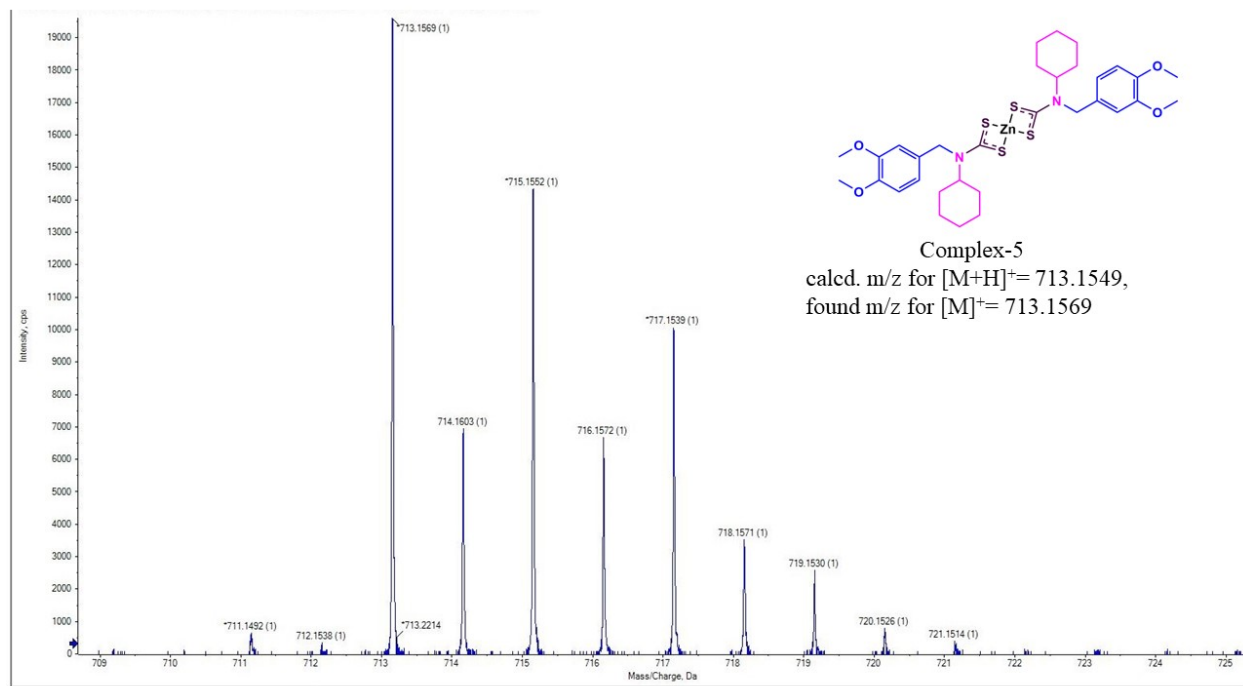

Fig. S13: HRMS spectrum of complex **5**.

#### 4. X-ray crystallography

X-Ray diffraction measurements of complexes **4** and **5** were performed using Oxford Gemini and Bruker three-circle diffractometer equipped with a CrysAlisPro/CrysAlis CCD software using a graphite mono-chromated Mo K $\alpha$  ( $\lambda = 0.71073$  Å) radiation source at 296 K. The details of the temperature and monochromator of diffractometers are mentioned in the crystallographic data tables. Multi-scan absorption correction was applied to the X-ray data collection for all the compounds. The structures were solved by direct methods (SHELXS-08) and refined against all data by full matrix least-square on F2 using anisotropic displacement parameters for all non-hydrogen atoms. All hydrogen atoms were included in the refinement at geometrically ideal position and refined with a riding model<sup>1</sup>. The MERCURY package and ORTEP-3 for Windows program were used for generating structures<sup>2,3</sup>. Single crystals of complex **5** was kept at 100.00 K during data collection. The material was recrystallized from methanol by slow evaporation.

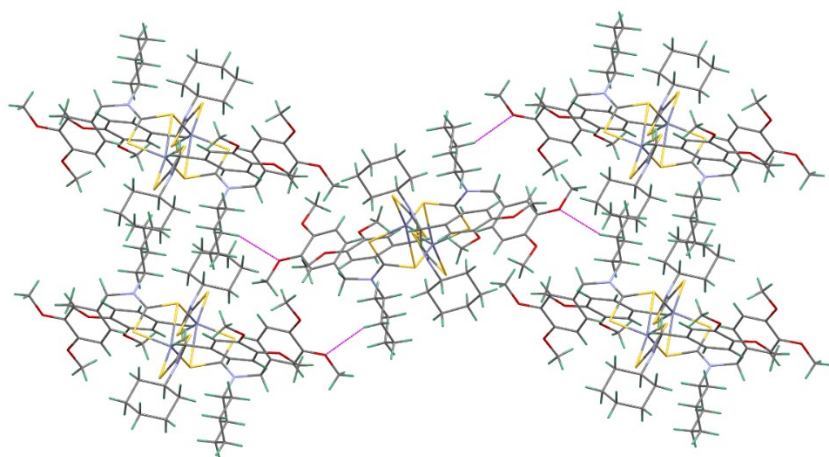

Fig. S14: Showing the intermolecular C-H $\cdots$ O hydrogen bonding interactions leading to wave like structures.

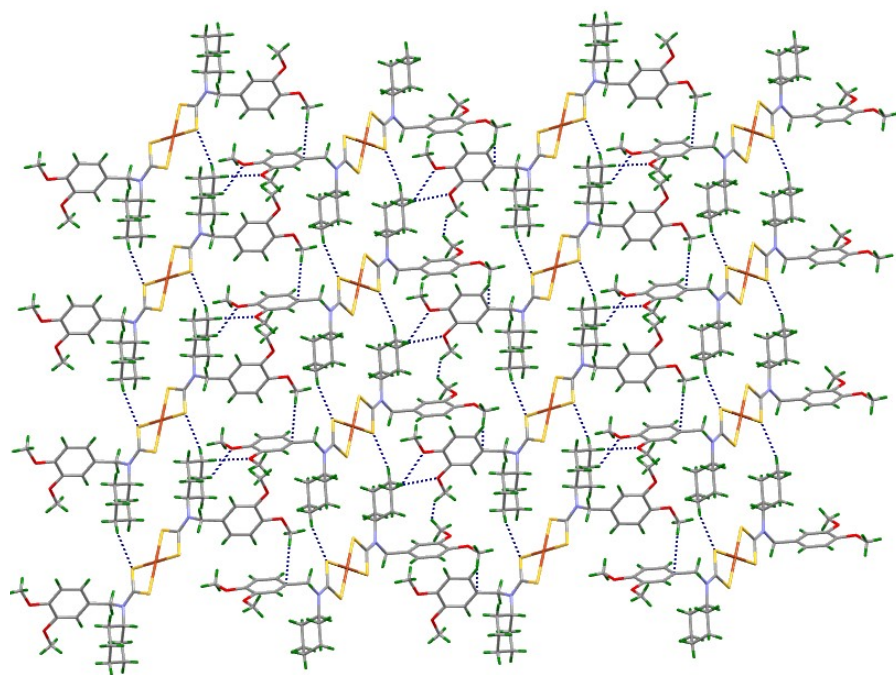

Fig. S15: Showing the intermolecular C-H $\cdots$ S hydrogen bonding interactions leading to ladder-like structures.

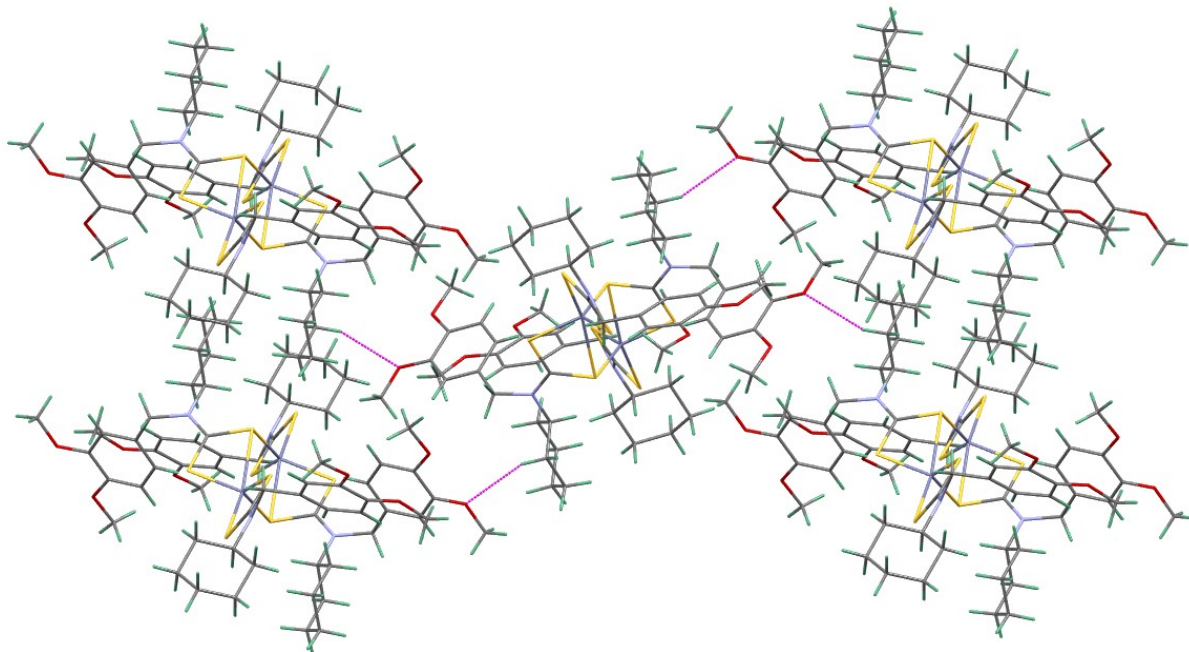

Fig. S16: Showing the intermolecular C-H $\cdots$ O hydrogen bonding interactions leading to a 2D supramolecular architecture.

**Table S1.** Hydrogen bond parameters for complex 4.

| D-H $\cdots$ A    | d(D-H) | d(H $\cdots$ A) | d(D $\cdots$ A) | $\angle$ (DHA) |
|-------------------|--------|-----------------|-----------------|----------------|
| C(9)-H(9)...S(1)  | 0.98   | 2.54            | 3.0345(16)      | 111.0          |
| C(2)-H(2B)...S(2) | 0.97   | 2.49            | 3.0276(18)      | 114.6          |

Symmetry transformations used to generate equivalent atoms: #1 -x,-y,-z+1

**Table S2.** Hydrogen bond parameters for complex 5.

| D-H $\cdots$ A     | d(D-H) | d(H $\cdots$ A) | d(D $\cdots$ A) | $\angle$ (DHA) |
|--------------------|--------|-----------------|-----------------|----------------|
| C(27)-H(27)...S(3) | 0.98   | 2.50            | 3.041(3)        | 114.6          |
| C(9)-H(9)...S(2)   | 0.98   | 2.52            | 3.006(2)        | 110.6          |
| C(2)-H(2B)...S(1)  | 0.97   | 2.52            | 3.009(3)        | 111.0          |

Symmetry transformations used to generate equivalent atoms:  
#1 -x+1,-y+1,-z+1

## 5. Biological application

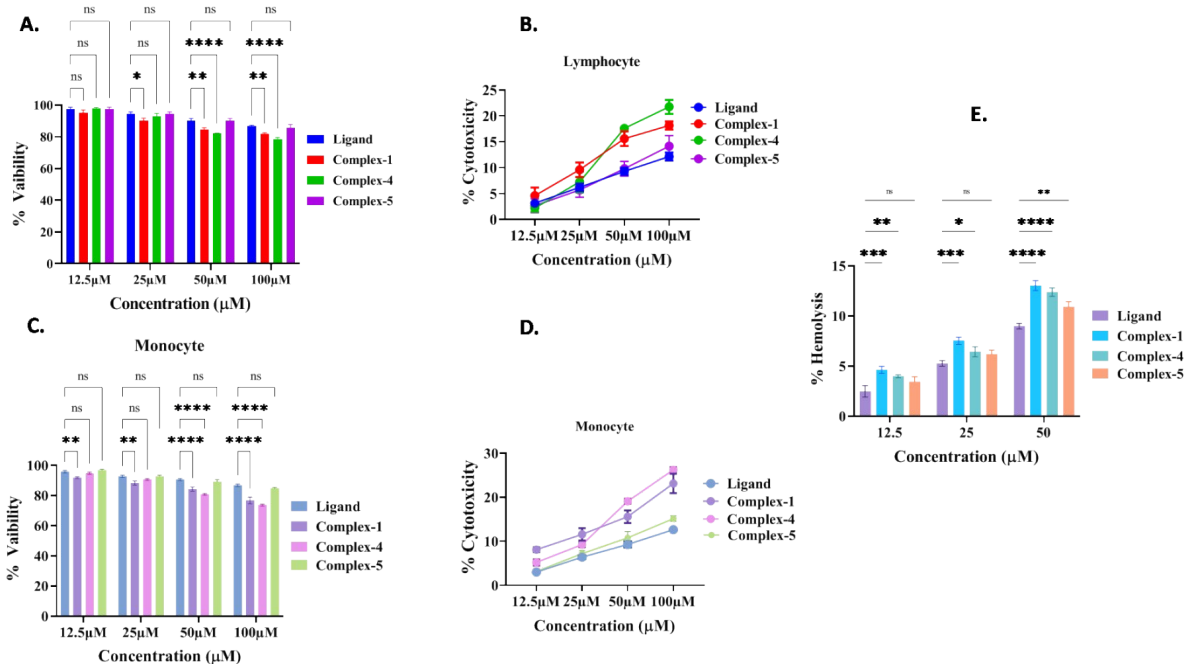

Fig. S17: Biocompatibility and hemocompatibility study of complexes 1, 4 & 5. Biocompatibility analysis in human monocytes and lymphocytes in the presence of indicated formulations as judged by viability (A & C) and cytotoxicity (B & D) of the lymphocytes and monocytes. Percent hemolysis of RBC following treatment for 4 hours in the presence of varying concentrations of the indicated formulations (E).

## 6. References:

- [1] G.M. Sheldrick, *Acta Crystallogr. Section A*, 2008, 64, 112-122.
- [2] C.F. Macrae, I.J. Bruno, J.A. Chisholm, P.R. Edgington, P. McCabe, E. Pidcock, L. Rodriguez-Monge, R. Taylor, J. Van de Streek, P.A., Wood, *Appl. Cryst.*, 2008, 41, 466-470.
- [3] L.J. Farrugia, *J. Appl. Cryst.*, 2012, 45, 849-854.
